# Supplementary material for: Optimal Isolation Method of Small Extracellular Vesicles from Rat Plasma
Source: MDPI journal article supplement (doi:10.3390/ijms20194780), 2019-09-26
Supplement: s1 [file s1]

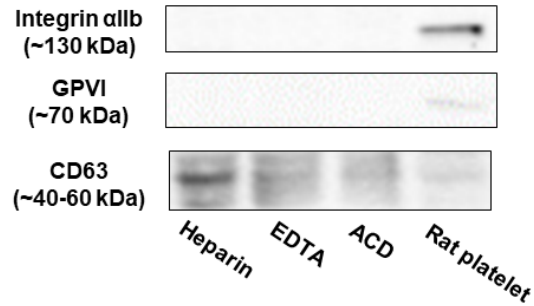

**Supplementary Figure 1.** Expression of marker proteins for platelet (integrin  $\alpha$ IIb and GPVI) in small extracellular vesicles (sEV) from anticoagulated plasma. Total protein was extracted from sEV isolated from heparin (1 U/ml)-, EDTA (1 mg/ml)-, or ACD (13%)-anticoagulated plasma of Wistar rats (5-10-week-old) by a precipitation with polyethylene-glycol and ultracentrifugation (PEG-UC) method. The expression of protein was determined by Western blotting using an antibody to integrin  $\alpha$ IIb and GPVI (a platelet marker) or CD63 (an sEV marker). Protein extract of rat platelet was loaded as a positive control for expression of platelet marker proteins. Representative images were shown (n = 4). CD63 blot in this Figure was from the same origin as shown in Fig. 5e.

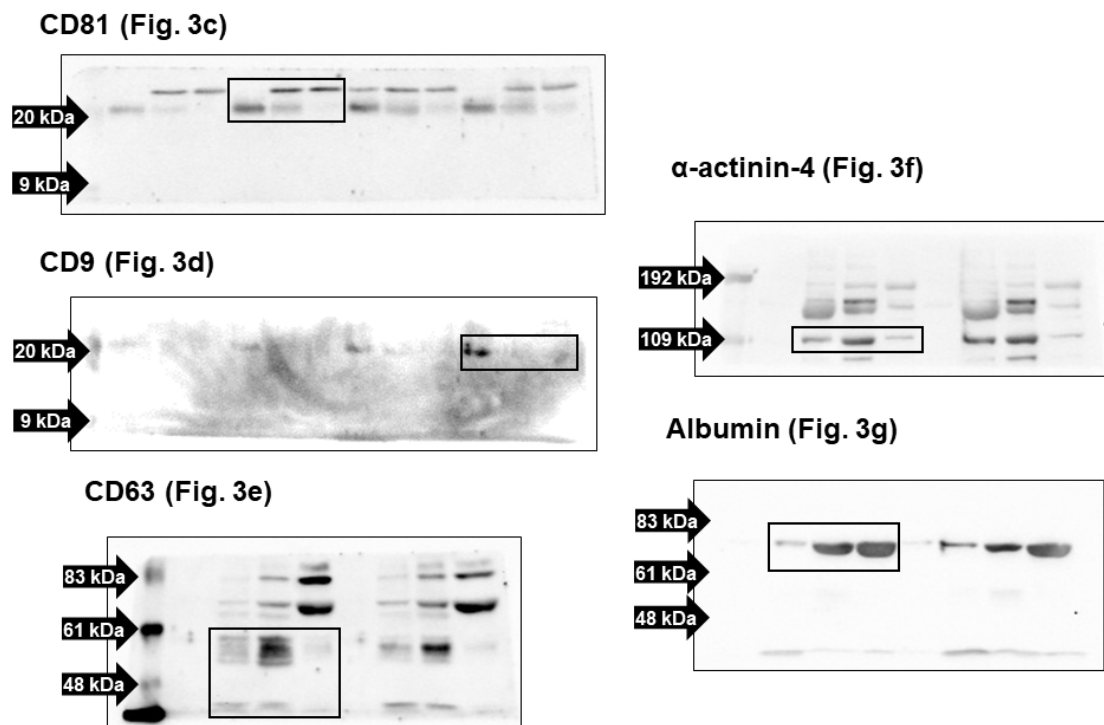

**Supplementary Figure 2.** Uncropped blot images by Western blotting in Figure 3c-3g. Black arrows indicate the bands of molecular weight marker, and black-edged frames show the cropped areas represented in Figure 3c-3g.

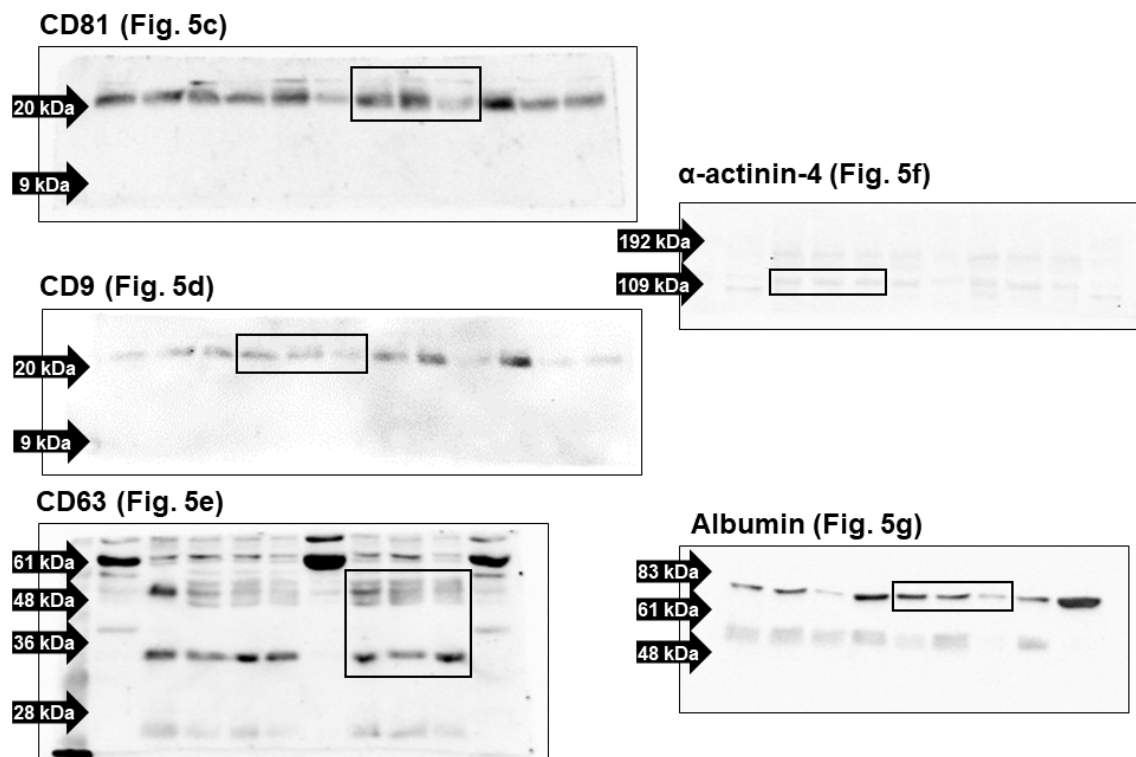

**Supplementary Figure 3.** Uncropped blot images by Western blotting in Figure 5c-5g. Black arrows indicate the bands of molecular weight marker, and black-edged frames show the cropped areas represented in Figure 5c-5g.

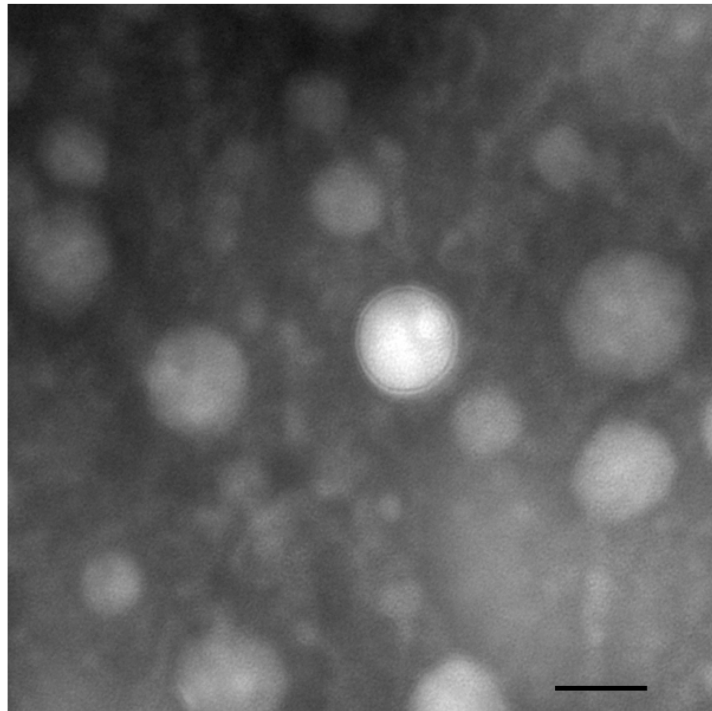

**Supplementary Figure 4.** Microscopic evaluation of sEV by using a transmission electronic microscope (TEM). sEV isolated from heparin (1 U/ml)-anticoagulated plasma of Wistar rats (6-week-old) by a PEG-UC method were fixed with 2% paraformaldehyde. The fixed sEV were stained with phosphotungstic acid on a carbon-coated copper grid and observed by using TEM (80 MeV,  $\times 15000$ ). Scale bar: 100 nm.
